# Supplementary material for: Facile fabrication of mesoporosity driven N–TiO2@CS nanocomposites with enhanced visible light photocatalytic activity
Source: Royal Society of Chemistry journal article supplement (doi:10.1039/c3ra22775h), 2013-01-01
Supplement: c3ra22775h.pdf [file c3ra22775h.pdf]

Supporting Information

**Facile fabrication of Mesoporosity Driven N-TiO<sub>2</sub>@CS nanocomposite with  
Enhanced Visible Light Photocatalytic Activity**

**Soumyashree Pany, K.M. Parida\* and Brundabana Naik**

*Colloids and Materials Chemistry Department,*

*Institute of Minerals and Materials Technology (CSIR), Bhubaneswar – 751 013, Odisha, INDIA*

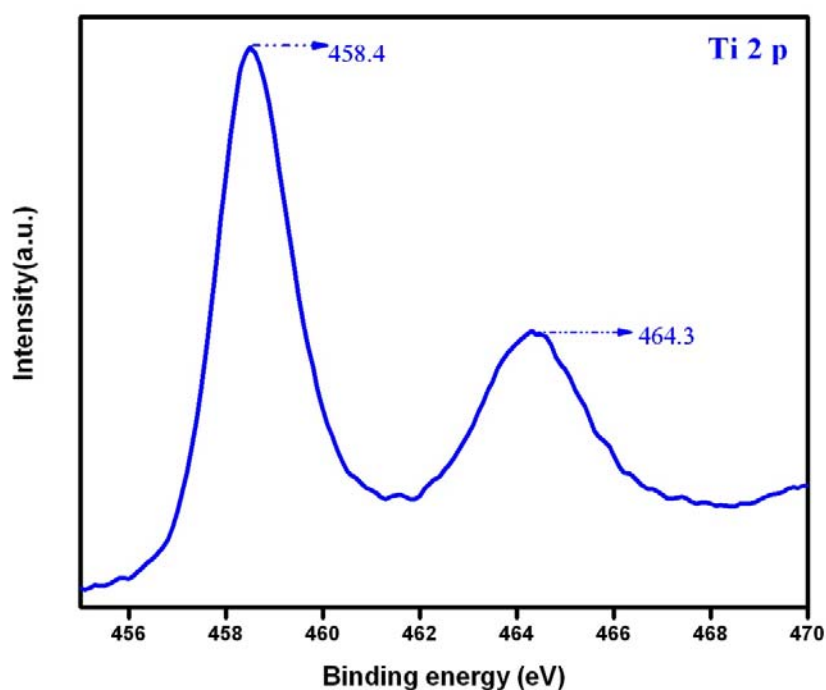

Fig.S1 XPS spectra of core level Ti 2p

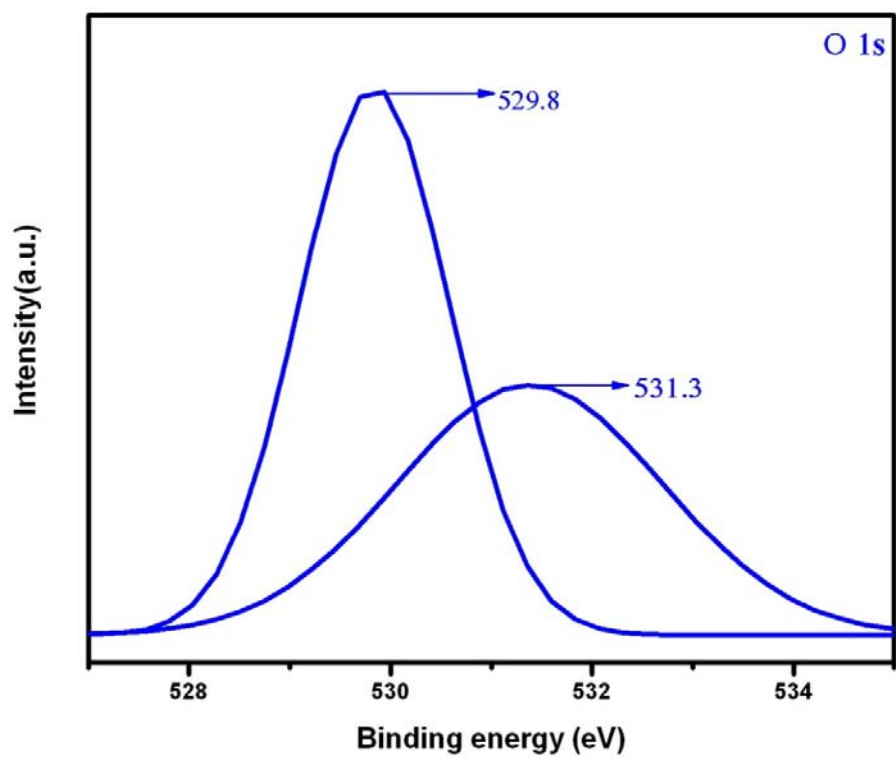

Fig.S2 XPS spectra of core level O 1s
